# Supplementary material for: The impact of night-shift work on platelet function in healthy medical staff
Source: PubMed Central journal article supplement — J Occup Health. 2018 Apr 18;60(4):324–32. doi: 10.1539/joh.2018-0027-FS (PMC6078842; doi:10.1539/joh.2018-0027-fs), 2018-04-18
Supplement: 1348-9585-60-324-s001.pdf [file 1348-9585-60-324-s001.pdf]

Supplementary Table 1. Comparison of platelet aggregation rates estimated by the light scattering method between baseline and after night-shift work ( $n = 11$ )

| SPA                           | Baseline<br>median (IQR) | After the shift<br>median (IQR) | Post-shift—baseline<br>mean (95% CI) | $p$ -value |
|-------------------------------|--------------------------|---------------------------------|--------------------------------------|------------|
| Log SMAX                      | 3.8 (3.5–4.0)            | 3.8(3.5–3.8)                    | -0.0 (-0.2 to 0.2)                   | .949       |
| Log SAUC                      | 6.3 (5.9–6.4)            | 6.2 (6.0–6.4)                   | 0.0 (-0.1 to 0.2)                    | .586       |
| Log TMAX                      | 3.9 (3.6–4.0)            | 3.8 (3.7–4.0)                   | 0.0 (-0.2 to 0.2)                    | .844       |
| Log TAUC                      | 6.3 (6.0–6.4)            | 6.2 (6.1–6.4)                   | 0.0 (-0.1 to 0.2)                    | .547       |
| ADP (0.5 $\mu$ M)             | Baseline<br>median (IQR) | After the shift<br>median (IQR) | Post-shift—baseline<br>mean (95% CI) | $p$ -value |
| Log SMAX                      | 5.3 (5.2–5.3)            | 5.3 (5.2–5.3)                   | -0.0 (-0.0 to 0.0)                   | .969       |
| Log SAUC                      | 7.4 (7.0–7.8)            | 7.3 (6.9–7.6)                   | -0.6 (-0.2 to 1.0)                   | .413       |
| Log TMAX                      | 5.5 (5.2–5.6)            | 5.4 (5.3–5.5)                   | -0.0 (-0.1 to 0.0)                   | .493       |
| Log TAUC                      | 7.4 (7.1–8.0)            | 7.3 (6.9–7.7)                   | -0.1 (-0.2 to 0.0)                   | .105       |
| Collagen<br>(0.1 $\mu$ g/ml)  | Baseline<br>median (IQR) | After the shift<br>median (IQR) | Post-shift—baseline<br>mean (95% CI) | $p$ -value |
| Log SMAX                      | 4.5 (4.1–5.1)            | 4.2 (4.1–5.1)                   | -0.1 (-0.5 to 0.2)                   | .385       |
| Log SAUC                      | 6.9 (6.5–7.2)            | 6.7 (6.6–7.1)                   | -0.1 (-0.4 to 0.2)                   | .583       |
| Log TMAX                      | 4.5 (4.1–5.3)            | 4.2 (4.1–5.3)                   | -0.1 (-0.5 to 0.3)                   | .630       |
| Log TAUC                      | 6.9 (6.5–7.5)            | 6.7 (6.7–7.8)                   | -0.0 (-0.5 to 0.4)                   | .868       |
| Epinephrine<br>(0.1 $\mu$ M)  | Baseline<br>median (IQR) | After the shift<br>median (IQR) | Post-shift—baseline<br>mean (95% CI) | $p$ -value |
| Log SMAX                      | 4.7 (4.3–5.3)            | 4.7 (4.5–5.1)                   | -0.0 (-0.3 to 0.2)                   | .840       |
| Log SAUC                      | 7.3 (6.8–7.6)            | 7.1 (7.0–7.6)                   | -0.0 (-0.2 to 0.2)                   | .975       |
| Log TMAX                      | 4.7 (4.3–5.5)            | 4.7 (4.5–5.1)                   | -0.1 (-0.4 to 0.2)                   | .662       |
| Log TAUC                      | 7.3 (6.8–7.8)            | 7.1 (7.0–7.6)                   | -0.0 (-0.3 to 0.2)                   | .691       |
| Epinephrine<br>(0.25 $\mu$ M) | Baseline<br>median (IQR) | After the shift<br>median (IQR) | Post-shift—baseline<br>mean (95% CI) | $p$ -value |
| Log SMAX                      | 5.3 (4.6–5.3)            | 5.1 (4.8–5.3)                   | 0.0 (-0.2 to 0.2)                    | .973       |
| Log SAUC                      | 7.6 (7.2–7.8)            | 7.6 (7.4–7.8)                   | 0.0 (-0.2 to 0.2)                    | .882       |
| Log TMAX                      | 5.3 (4.6–5.5)            | 5.1 (4.8–5.4)                   | -0.0 (-0.3 to 0.3)                   | .930       |
| Log TAUC                      | 7.8 (7.2–8.0)            | 7.6 (7.5–8.0)                   | -0.0 (-0.2 to 0.2)                   | .918       |

SPA, spontaneous platelet aggregation; ADP, adenosine 5'-diphosphate; SMAX, the maximum light intensity scattered by small aggregates; SAUC, the area under the light intensity curve for small aggregates; TMAX, the maximum of the sum of light intensities scattered by small, medium, and large aggregates; TAUC, the sum of the areas under the light scattering intensity curves of small, medium, and large aggregates; IQR, interquartile range; post-shift—baseline, difference in parameter values between baseline and after night-shift work; CI, confidence interval. Median values were compared using paired  $t$ -tests.

Supplementary Table 2. Comparison of serum concentrations of eicosanoid mediators between baseline and after night-shift work ( $n = 11$ )

| Cox-metabolized eicosanoid mediator         | Baseline median (IQR) | After the shift median (IQR) | Post-shift—baseline mean (95% CI) | $p$ -value        |
|---------------------------------------------|-----------------------|------------------------------|-----------------------------------|-------------------|
| TxB <sub>2</sub> , ng/ml                    | 65.3 (23.1–169.4)     | 180.4 (93.5–258.9)           | 99.7 (14.4 to 184.9)              | .026              |
| 11-dehydro TxB <sub>2</sub> , ng/ml         | 1.8 (0.8–3.9)         | 3.4 (1.6–6.2)                | 2.0 (–0.6 to 4.6)                 | .122              |
| 12-HHT, ng/ml                               | 44.4 (17.2–107.7)     | 116.7 (67.1–156.9)           | 57.3 (1.2 to 113.5)               | .046              |
| PGE <sub>2</sub> , ng/ml                    | 1.0 (0.3–4.0)         | 4.1 (1.8–6.2)                | 2.8 (0.1 to 5.5)                  | .042              |
| PGF <sub>2<math>\alpha</math></sub> , ng/ml | 0.4 (0.2–1.3)         | 1.2 (0.7–1.8)                | 0.7 (0.1 to 1.2)                  | .032              |
| PGD <sub>2</sub> , ng/ml                    | 0.3 (0.1–0.7)         | 1.1 (0.4–2.9)                | 0.6 (–0.04 to 2.9)                | .010 <sup>†</sup> |
| Tetranor-PGEM, pg/ml                        | 326.0 (299.0–371.5)   | 331.0 (304.0–413.0)          | 19.8 (–51.0 to 90.5)              | .547              |
| 8-iso-PGE <sub>2</sub> , pg/ml              | 95.0 (27.5–433.0)     | 404.5 (185.0–549.0)          | 239.3 (–19.5 to 498.1)            | .066              |
| 15-HETE, ng/ml                              | 1.8 (1.0–5.3)         | 4.9 (3.5–8.4)                | 2.8 (0.1 to 5.4)                  | .043              |
| 11-HETE, ng/ml                              | 2.6 (0.9–5.9)         | 6.9 (3.8–9.6)                | 3.6 (0.6 to 6.6)                  | .024              |
| 12-LOX-metabolized eicosanoid mediator      | Baseline median (IQR) | After the shift median (IQR) | Post-shift—baseline mean (95% CI) | $p$ -value        |
| 12-HETE, ng/ml                              | 24.0 (11.9–46.5)      | 32.3 (20.9–80.5)             | 28.3 (–3.5 to 60.1)               | .075              |
| 5-HETE, pg/ml                               | 451.5 (336.0–1045.5)  | 407.0 (258.5–480.5)          | –231.4 (–405.4 to –57.4)          | .014              |
| CYP-metabolized eicosanoid mediator         | Baseline median (IQR) | After the shift median (IQR) | Post-shift—baseline mean (95% CI) | $p$ -value        |
| 20-Carboxy-AA, ng/ml                        | 2.2 (1.6–2.5)         | 2.3 (1.7–2.9)                | 0.1 (–0.4 to 0.6)                 | .631              |
| 14,15-DHET, pg/ml                           | 231.5 (159.5–322.0)   | 216.0 (187.5–255.5)          | –23.0 (–72.9 to 27.0)             | .330              |
| 11,12-DHET, pg/ml                           | 160.0 (109.5–200.5)   | 142.0 (104.5–186.5)          | –10.8 (–52.8 to 31.1)             | .578              |
| 9-HETE, ng/ml                               | 0.8 (0.4–2.2)         | 1.4 (0.9–3.5)                | 1.2 (–0.2 to 2.7)                 | .093              |
| 8-HETE, pg/ml                               | 128.5 (66.5–170.5)    | 128.5 (83.5–220.5)           | 38.7 (–28.8 to 106.1)             | .230              |

COX, cyclooxygenase; TxB<sub>2</sub>, thromboxane B<sub>2</sub>; 12-HHT, 12-hydroxyheptadecatrienoic acid; PG, prostaglandin; PGEM, prostaglandin E metabolite; HETE, hydroxyeicosatetraenoic acid; LOX, lipoxygenase; CYP, cytochrome P450; AA, arachidonic acid; DHET, dihydroxyeicosatrienoic acid; IQR, interquartile range; post-shift—baseline, difference in parameter values between baseline and after night-shift work; CI, confidence interval. <sup>†</sup>Wilcoxon signed-rank test, all other comparisons used paired  $t$ -tests.
